# Supplementary material for: Secreted Factors and Extracellular Vesicles Account for the Immunomodulatory and Tissue Regenerative Properties of Bone-Marrow-Derived Mesenchymal Stromal Cells for Osteoarthritis
Source: MDPI journal article supplement (doi:10.3390/cells11213501), 2022-11-04
Supplement: s1 [file s1]

Table S1: Protein lists for the most representative GO terms identified within scored secreted factors

Table S1A

- GO:0006955      Immune response 63  
MIF, CCL17, CSF3, CCL2, CCL1, CCL13, IL2, IL23A, IFNG, IL4, IL1RL1, LIF, IL1RN, CCL21, CCL27, IL17B, TIMP2, IL1A, IL1B, IL7, ICAM1, CXCL13, KIT, CXCL16, VCAM1, PPBP, PF4, IL15, TNFRSF21, CSF2, AXL, CCL11, IL16, CD14, CXCL10, ALCAM, CXCL8, CXCL11, CSF1, IFNL1, IFNL2, ANG, PLAUR, FAS, CCL20, CXCL9, XCL1, IL6R, CTSS, IL13RA2, CD40, TNFRSF1B, CCL7, CCL25, CCL8, CXCL12, IL6, TNF, CCL24, MYD88, TNFSF14, CCL5, CCL4
  
- GO:0006954      Inflammatory response 46  
TNFRSF1A, MIF, TIMP1, CCL17, TGFB1, CCL2, CCL1, CCL13, IL23A, IFNG, IL4, IL1RN, CCL21, IL17B, IL1A, IL1B, ICAM1, IGFBP4, EGFR, CXCL13, KIT, PPBP, PF4, IL15, AXL, CCL11, CD14, CXCL10, CXCL8, CXCL11, CSF1, CCL20, CXCL9, XCL1, IL6R, CD40, TNFRSF1B, CCL7, CCL25, CCL8, SPP1, IL6, TNF, CCL24, CCL5, CCL4
  
- GO:0006935      Chemotaxis 43  
MIF, CCL17, HGF, CCL2, CCL1, CCL13, BMP4, CCL21, CCL27, PDGFRB, IL1B, CXCL13, KIT, CXCL16, PPBP, PF4, SHH, CCL11, IL16, CXCL10, ALCAM, CXCL8, CXCL11, PDGFB, CNTN2, PLAUR, CCL20, CXCL9, XCL1, IL6R, ENG, CCL7, CCL25, CCL8, CXCL12, IL6, CCL24, ANGPT1, PGF, CCL5, VEGFA, VEGFC, CCL4
  
- GO:0030198      Extracellular matrix organization      14  
TIMP1, TGFB1, SERPINE1, TIMP2, KDR, ICAM1, VCAM1, TNFRSF11B, PDGFB, CTSS, ENG, SP1, TNF, ICAM2

Table S1B

- GO:0030595      Leukocyte chemotaxis 30  
CCL17, CCL2, CCL1, CCL13, CCL21, IL1B, CXCL13, KIT, CXCL16, PPBP, PF4, CCL11, IL16, CXCL10, CXCL8, CXCL11, PDGFB, CCL20, CXCL9, XCL1, IL6R, CCL7, CCL25, CCL8, CXCL12, IL6, CCL24, CCL5, VEGFA, CCL4
  
- GO:0071621      Granulocyte chemotaxis      23  
CCL17, CCL2, CCL1, CCL13, CCL21, IL1B, CXCL13, PPBP, PF4, CCL11, CXCL10, CXCL8, CXCL11, CCL20, CXCL9, XCL1, CCL7, CCL25, CCL8, CCL24, CCL5, VEGFA, CCL4
  
- GO:0048247      Lymphocyte chemotaxis 19  
CCL17, CCL2, CCL1, CCL13, CCL21, CXCL13, CXCL16, CCL11, CXCL10, CXCL11, CCL20, XCL1, CCL7, CCL25, CCL8, CXCL12, CCL24, CCL5, CCL4
  
- GO:0002548      Monocyte chemotaxis      17  
CCL17, CCL2, CCL1, CCL13, CCL21, CCL11, PDGFB, CCL20, XCL1, IL6R, CCL7, CCL25, CCL8, IL6, CCL24, CCL5, CCL4

TABLE S1C

- GO:0045321      Leukocyte activation 31  
MIF, IL2, IL23A, IFNG, IL4, CCL21, TIMP2, IL7, IL11, ICAM1, KIT, VCAM1, PPBP, IL15, CSF2, SHH, AXL, IL12A, CD14, CXCL8, CSF1, IL21R, PLAUR, CTSS, CD40, TNFRSF1B, IL6, TNF, TNFSF14, FLT3LG, CCL5

- GO:0046649      Lymphocyte activation 18  
IL2, IL23A, IL4, CCL21, IL7, IL11, ICAM1, KIT, VCAM1, IL15, SHH, AXL, IL12A, IL21R,  
CD40, IL6, TNFSF14, FLT3LG
- GO:0042110      T cell activation      12  
IL2, IL23A, IL4, CCL21, IL7, ICAM1, KIT, IL15, SHH, IL12A, IL6, TNFSF14
- GO:0042119      Neutrophil activation 10  
MIF, TIMP2, PPBP, IL15, CD14, CXCL8, PLAUR, CTSS, TNFRSF1B, CCL5
- GO:0042116      Macrophage activation 4  
IFNG, IL4, CSF2, TNF
